# Supplementary material
Source: Springer Nature journal article supplement (https://www.springermedizin.de/resource/supplementary/12950_2007_70_MOESM4_ESM.pdf/9557940)

**PGE<sub>2</sub> Concentration  
(pg/ml)**

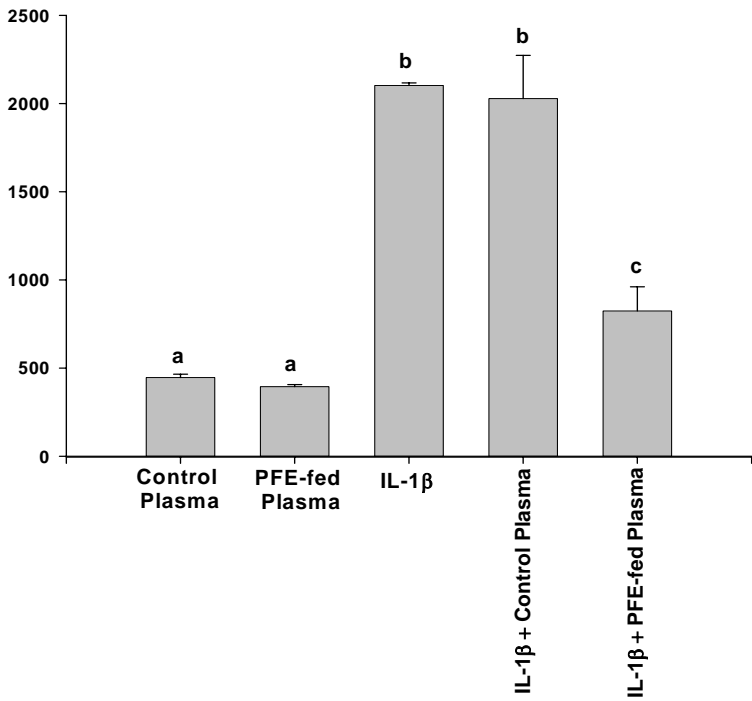

Supplement: MOESM4 [file 9557940]
